# Supplementary material for: Rapamycin rejuvenates oral health in aging mice
Source: eLife journal article supplement (doi:10.7554/elife.54318), 2020-04-27
Supplement: supp [file elife-54318-supp-v1.zip]

Archive with 5 entries (5 files):
- elife_poa_e54318_Figure_5_figure_supplement_3.pdf
- elife_poa_e54318_Figure_5_figure_supplement_4.pdf
- elife_poa_e54318_Figure_5_figure_supplement_2.pdf
- elife_poa_e54318_Figure_5_figure_supplement_1.pdf
- elife_poa_e54318_Transparent_Reporting_File.pdf
