# Supplementary figures and images for: Rapamycin rejuvenates oral health in aging mice
Source: eLife journal article supplement (doi:10.7554/elife.54318), 2020-04-27

Figure 5 – figure supplement 3

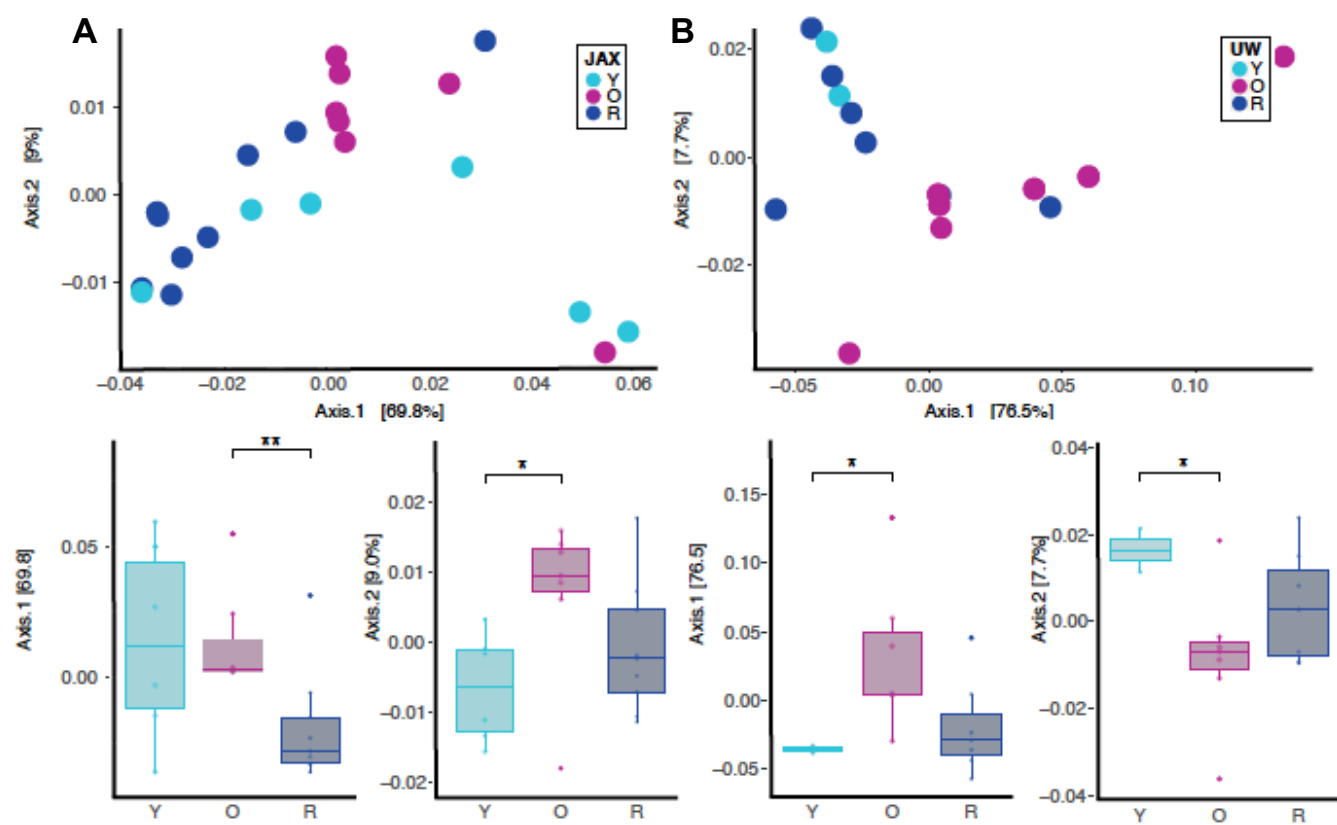

Supplement: supp [file elife-54318-supp-v1.zip › elife_poa_e54318_Figure_5_figure_supplement_3.pdf]

Figure 5 – figure supplement 4

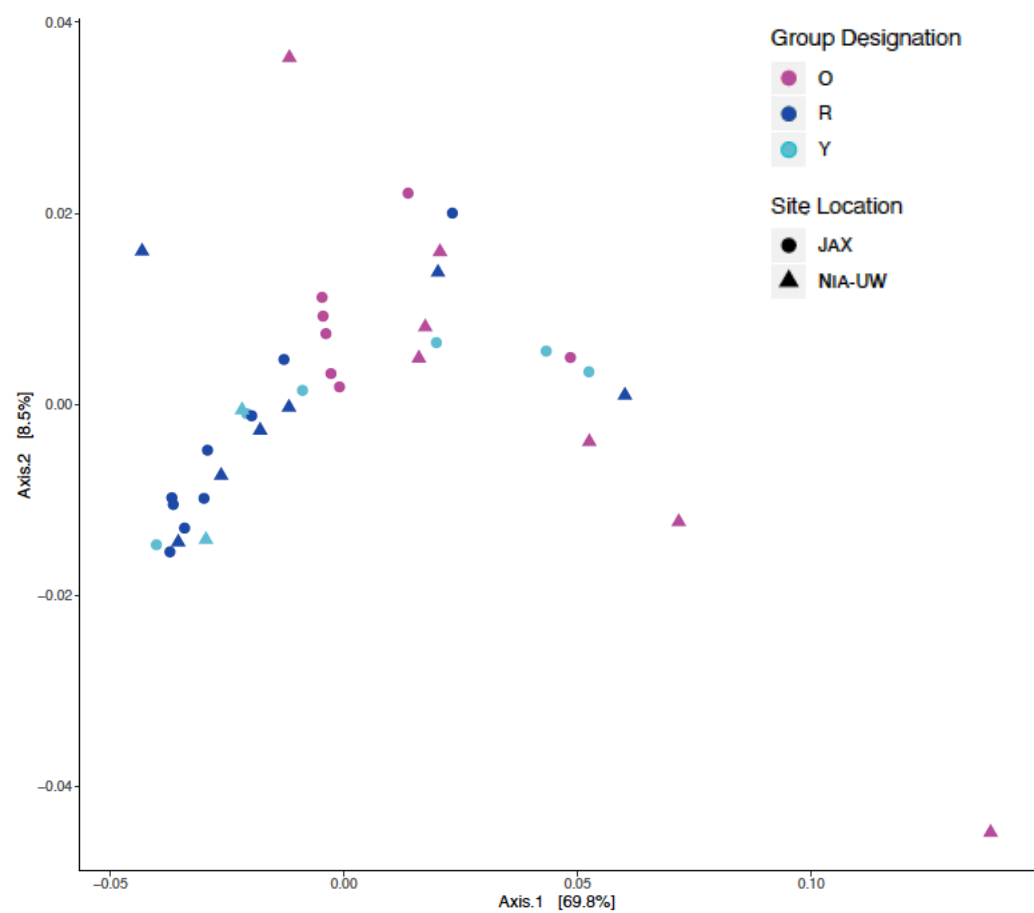

Supplement: supp [file elife-54318-supp-v1.zip › elife_poa_e54318_Figure_5_figure_supplement_4.pdf]

Figure 5 – figure supplement 2

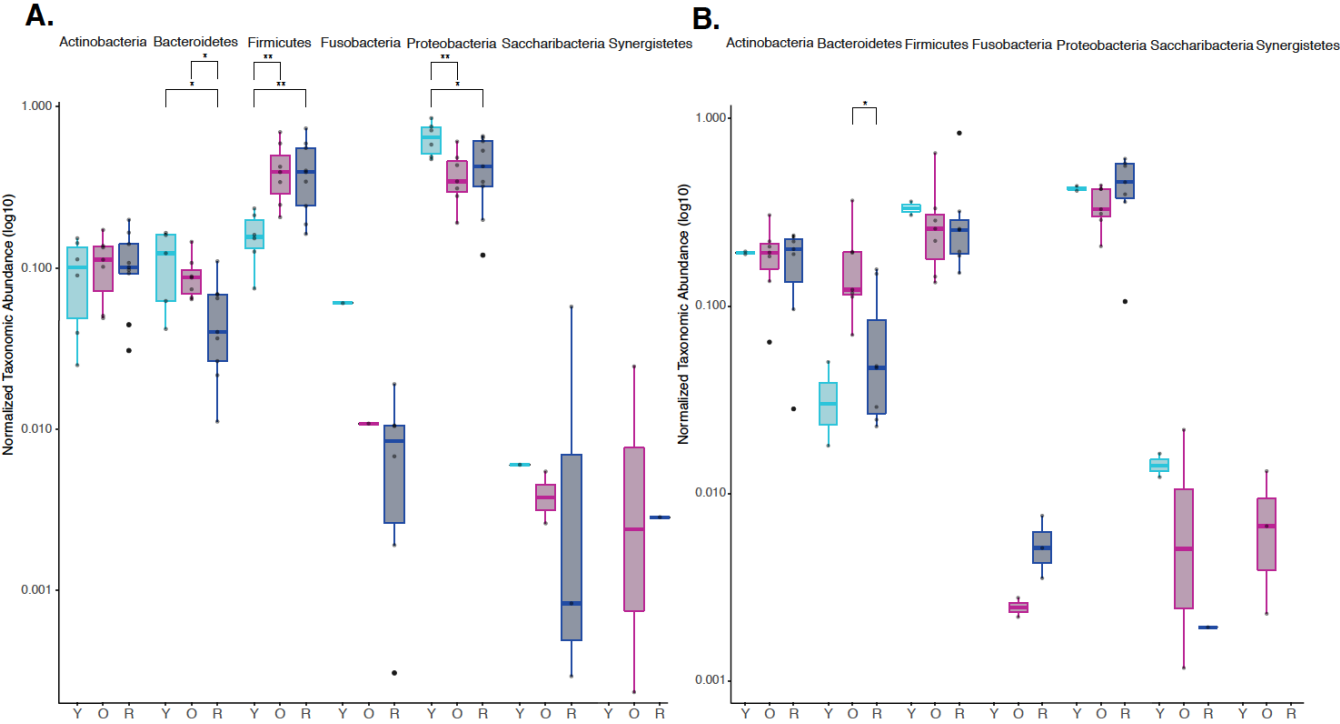

Supplement: supp [file elife-54318-supp-v1.zip › elife_poa_e54318_Figure_5_figure_supplement_2.pdf]

Figure 5 – figure supplement 1

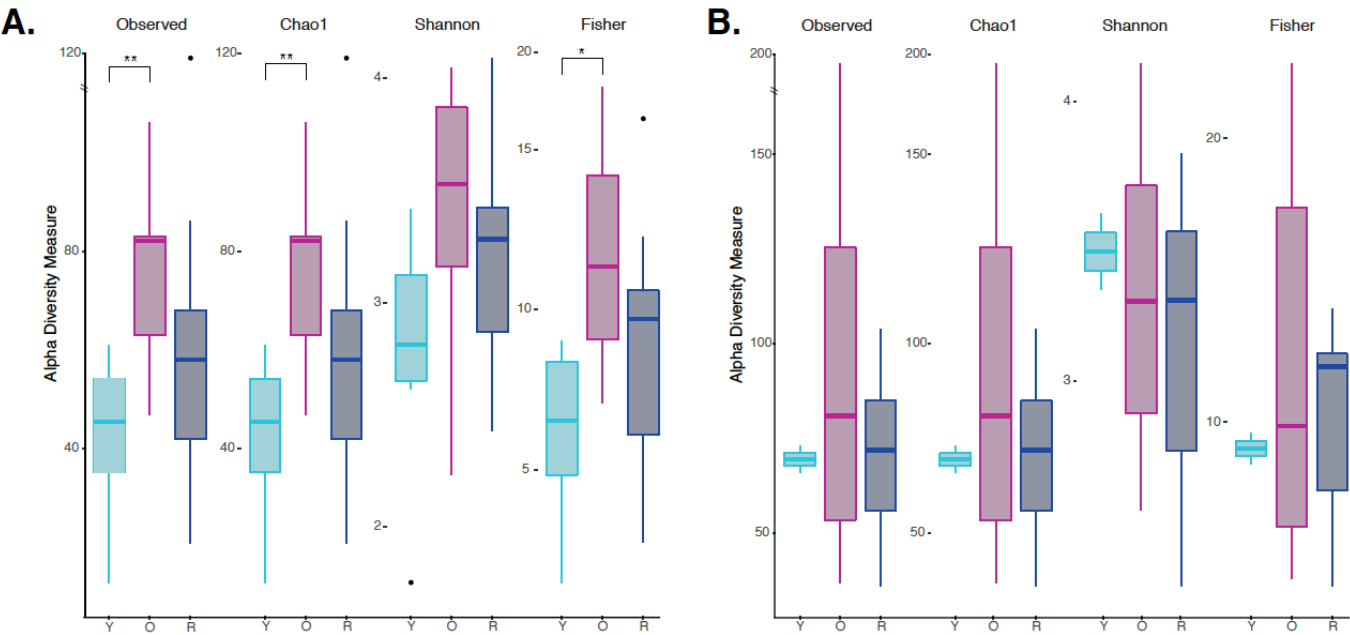

Supplement: supp [file elife-54318-supp-v1.zip › elife_poa_e54318_Figure_5_figure_supplement_1.pdf]
